# Supplementary material for: What is the feasibility and observed effect of two implementation packages for stroke rehabilitation therapists implementing upper limb guidelines? A cluster controlled feasibility study
Source: PubMed Central journal article supplement — BMJ Open Qual. 2020 May 24;9(2):e000954. doi: 10.1136/bmjoq-2020-000954 (PMC7252969; doi:10.1136/bmjoq-2020-000954), 2020-05-24
Supplement: bmjoq-2020-000954supp001.pdf [file bmjoq-2020-000954supp001.pdf]

Online supplement 1: Implementation activities included in each of the three group packages, mapped against Capability, Opportunity, Motivation- Behaviour (COM-B) model, the Theoretical Domains Framework (TDF) and behaviour change intervention function (as per the Behaviour Change Wheel).

| COM-B Domain             | TDF Domain                               | Behaviour change intervention function | Implementation strategies used in the intervention package                                                       | Facilitator-mediated implementation package | Self-directed implementation package | Usual care package |
|--------------------------|------------------------------------------|----------------------------------------|------------------------------------------------------------------------------------------------------------------|---------------------------------------------|--------------------------------------|--------------------|
| Physical capability      | Physical skills                          | Training                               | Point-of-care videos demonstrating clinical practice                                                             | ✓                                           | ✓                                    |                    |
| Psychological capability | Knowledge                                | Education                              | Usual EBP support and in-services                                                                                | ✓                                           | ✓                                    | ✓                  |
|                          | Knowledge                                | Education                              | Fortnightly / Monthly supervision with senior peer-therapist                                                     | ✓                                           | ✓                                    | ✓                  |
|                          | Knowledge                                | Education                              | Face-to-Face education sessions                                                                                  | ✓                                           |                                      |                    |
|                          | Knowledge                                | Education                              | Online Modules                                                                                                   | ✓                                           | ✓                                    |                    |
|                          | Knowledge                                | Education                              | Evidence Summary Postcards                                                                                       | ✓                                           | ✓                                    |                    |
|                          | Knowledge                                | Education                              | Posters of each clinical practice guideline recommendation                                                       | ✓                                           | ✓                                    |                    |
|                          | Knowledge                                | Education                              | Written Manuals                                                                                                  | ✓                                           | ✓                                    |                    |
|                          | Memory, attention and decision processes | Modelling                              | Coaching and mentoring from senior therapist                                                                     | ✓                                           |                                      |                    |
|                          | Cognitive and interpersonal skills       | Persuasion                             | Strategy provision for patient coaching and motivational interviewing.                                           | ✓                                           |                                      |                    |
|                          | Behaviour regulation                     | Incentivisation                        | Auditing of files and patient timetable to provide real-time feedback on the amount and type of therapy provided | ✓                                           |                                      |                    |

|                      |                                     |                             |                                                                                                                 |                                                    |   |
|----------------------|-------------------------------------|-----------------------------|-----------------------------------------------------------------------------------------------------------------|----------------------------------------------------|---|
| Physical opportunity | Environmental context and resources | Environmental restructuring | Access to essential resources (e-stims, GRASP kits, assessments)                                                | ✓                                                  | ✓ |
|                      | Environmental context and resources | Environmental restructuring | Access to intervention resources (portable upper limb kits, assessments, CIMT mitts, treatment tables)          | ✓                                                  |   |
|                      | Environmental context and resources | Environmental restructuring | Care pathway to simplify clinical reasoning to adhere to amount / intensity CPG                                 | ✓                                                  | ✓ |
|                      | Environmental context and resources | Environmental restructuring | Space created for self-practice                                                                                 | ✓                                                  |   |
|                      | Environmental context and resources | Environmental restructuring | Time Management: Group sessions to support one another to deliver an hour/day upper limb rehabilitation         | ✓                                                  |   |
|                      | Environmental context and resources | Environmental restructuring | Time Management: posters for how to increase the amount of therapy without increasing therapist one-on-one time | ✓                                                  | ✓ |
|                      | Reflective Motivation               | Goals                       | Environmental restructuring                                                                                     | Pre-planned treatment plans based on patient goals | ✓ |
| Social opportunity   | Social influences                   | Coercion                    | Consumer information: Evidence based therapy and CPG Posters/Brochures                                          | ✓                                                  | ✓ |
|                      | Social influences                   | Coercion                    | Consumer information: Seminars for consumers                                                                    | ✓                                                  |   |

COM-B= Capability, Opportunity, Motivation- Behaviour, TDF= Theoretical Domains Framework, EBP= Evidence Based Practice, CPG= Clinical Practice Guideline, UL= Upper Limb, CIMT= Constraint Induced Movement Therapy, GRASP= Graded Repetitive Arm Supplementary Program.
